# Supplementary material for: CREBRF missense variant rs373863828 has both direct and indirect effects on type 2 diabetes and fasting glucose in Polynesians living in Samoa and Aotearoa New Zealand
Source: bioRxiv or medRxiv preprint supplement (doi:10.1101/2021.02.15.21251768), 2021-02-19
Supplement: Supplementary file [file media-1.pdf]

**Supplementary Table S1:** Equations for the linear mixed models

| <b>Model</b>        | <b>Equation</b>                                                                                |
|---------------------|------------------------------------------------------------------------------------------------|
| obesity-stratified  | $T2D \sim (cAge \times sex) + (cAge^2 \times sex) + cAge + sex + cAge^2 + gt + \ln BMI + k$    |
|                     | $\ln FG \sim (cAge \times sex) + (cAge^2 \times sex) + cAge + sex + cAge^2 + gt + \ln BMI + k$ |
| genotype-stratified | $T2D \sim (cAge \times sex) + (cAge^2 \times sex) + cAge + sex + cAge^2 + \ln BMI + k$         |
|                     | $\ln FG \sim (cAge \times sex) + (cAge^2 \times sex) + cAge + sex + cAge^2 + \ln BMI + k$      |

T2D = type 2 diabetes, k = kinship random effect, gt = additive rs373863828 genotype, cAge = centered and scaled age

**Supplementary Table S2:** Effect of (a) lnBMI and (b) rs37386388 on type 2 diabetes and fasting glucose in each cohort, stratified by obesity status

a. Predictor: lnBMI

| 1990–95 Samoan cohort<br>lnBMI      |     |                            |              | 2002–03 Samoan cohort<br>lnBMI |                                                          |              | 2010 Samoan cohort<br>lnBMI |                           |                       | 2006–2013 Aotearoa<br>New Zealand cohort<br>lnBMI |                          |                       |
|-------------------------------------|-----|----------------------------|--------------|--------------------------------|----------------------------------------------------------|--------------|-----------------------------|---------------------------|-----------------------|---------------------------------------------------|--------------------------|-----------------------|
| Dependent variable: type 2 diabetes |     |                            |              |                                |                                                          |              |                             |                           |                       |                                                   |                          |                       |
| Stratum<br>*                        | n   | OR (95% CI)                | <i>p</i>     | n                              | OR (95% CI)                                              | <i>p</i>     | n                           | OR (95% CI)               | <i>p</i>              | n                                                 | OR (95% CI)              | <i>p</i>              |
| without obesity                     | 546 | 0.194<br>(0.004, 10.430)   | 0.419        | 527                            | 16.275<br>( $1.65 \times 10^{-5}$ , $1.61 \times 10^7$ ) | 0.692        | 1,265                       | 12.692<br>(2.141, 75.240) | <b>0.005</b>          | 873                                               | 6.104<br>(1.028, 36.257) | <b>0.047</b>          |
| with obesity                        | 467 | 16.676<br>(1.411, 197.078) | <b>0.026</b> | 556                            | 6.032<br>(1.158, 31.416)                                 | <b>0.033</b> | 1,596                       | 1.484<br>(0.515, 4.278)   | 0.465                 | 1,251                                             | 7.807<br>(3.023, 20.159) | $2.14 \times 10^{-5}$ |
| Dependent variable: lnFG            |     |                            |              |                                |                                                          |              |                             |                           |                       |                                                   |                          |                       |
| Stratum<br>*                        | n   | $\beta$ (s.e.)             | <i>p</i>     | n                              | $\beta$ (s.e.)                                           | <i>p</i>     | n                           | $\beta$ (s.e.)            | <i>p</i>              | n                                                 | $\beta$ (s.e.)           | <i>p</i>              |
| without obesity                     | 546 | 0.030 (0.080)              | 0.708        | 472                            | 0.251 (0.082)                                            | <b>0.002</b> | 1,162                       | 0.249 (0.060)             | $3.81 \times 10^{-5}$ | **                                                | **                       | **                    |
| with obesity                        | 467 | 0.232 (0.105)              | <b>0.028</b> | 460                            | 0.127 (0.079)                                            | 0.629        | 1,425                       | 0.023 (0.062)             | 0.717                 | **                                                | **                       | **                    |

b. Predictor: rs37386388

| 1990–95 Samoan cohort<br>rs37386388 |     |                         |          | 2002–03 Samoan cohort<br>rs37386388 |                          |          | 2010 Samoan cohort<br>rs37386388 |                         |                       | 2006–2013 Aotearoa<br>New Zealand cohort<br>rs37386388 |                         |              |
|-------------------------------------|-----|-------------------------|----------|-------------------------------------|--------------------------|----------|----------------------------------|-------------------------|-----------------------|--------------------------------------------------------|-------------------------|--------------|
| Dependent variable: type 2 diabetes |     |                         |          |                                     |                          |          |                                  |                         |                       |                                                        |                         |              |
| Stratum<br>*                        | n   | OR (95% CI)             | <i>p</i> | n                                   | OR (95% CI)              | <i>p</i> | n                                | OR (95% CI)             | <i>p</i>              | n                                                      | OR (95% CI)             | <i>p</i>     |
| without obesity                     | 546 | 0.403<br>(0.139, 1.167) | 0.093    | 527                                 | 0.484<br>(0.014, 16.738) | 0.688    | 1,265                            | 0.564<br>(0.404, 0.789) | $8.27 \times 10^{-4}$ | 873                                                    | 0.619<br>(0.421, 0.909) | <b>0.014</b> |
| with obesity                        | 467 | 0.783<br>(0.459, 1.338) | 0.371    | 556                                 | 0.902<br>(0.608, 1.338)  | 0.608    | 1,596                            | 0.625<br>(0.500, 0.781) | $3.82 \times 10^{-5}$ | 1,251                                                  | 0.800<br>(0.623, 1.028) | 0.082        |
| Dependent variable: lnFG            |     |                         |          |                                     |                          |          |                                  |                         |                       |                                                        |                         |              |

| Stratum<br>*       | 1990–95 Samoan cohort<br>rs37386388 |                |              | 2002–03 Samoan cohort<br>rs37386388 |                |              | 2010 Samoan cohort<br>rs37386388 |                |                               | 2006–2013 Aotearoa<br>New Zealand cohort<br>rs37386388 |                |          |
|--------------------|-------------------------------------|----------------|--------------|-------------------------------------|----------------|--------------|----------------------------------|----------------|-------------------------------|--------------------------------------------------------|----------------|----------|
|                    | n                                   | $\beta$ (s.e.) | <i>p</i>     | n                                   | $\beta$ (s.e.) | <i>p</i>     | n                                | $\beta$ (s.e.) | <i>p</i>                      | n                                                      | $\beta$ (s.e.) | <i>p</i> |
| without<br>obesity | 546                                 | -0.034 (0.014) | <b>0.019</b> | 472                                 | -0.045 (0.017) | <b>0.010</b> | 1,162                            | -0.022 (0.011) | <b>0.044</b>                  | **                                                     | **             | **       |
| with<br>obesity    | 467                                 | -0.027(0.019)  | 0.159        | 460                                 | -0.010 (0.020) | 0.629        | 1,425                            | -0.042 (0.011) | <b>2.34 × 10<sup>-4</sup></b> | **                                                     | **             | **       |

\*without obesity: BMI ≤ 32 kg/m<sup>2</sup>; with obesity: BMI > 32 kg/m<sup>2</sup>

\*\*Fasting glucose was not measured in the Aotearoa New Zealand cohort

**Supplementary Table S3:** Effect of lnBMI on type 2 diabetes and fasting glucose in each cohort, stratified by genotype

| 1990–95 Samoan cohort<br>lnBMI             |     |                            |              | 2002–03 Samoan cohort<br>lnBMI |                                            |                               | 2010 Samoan cohort<br>lnBMI |                                          |                                | 2006–2013 Aotearoa New Zealand cohort<br>lnBMI |                          |                                |
|--------------------------------------------|-----|----------------------------|--------------|--------------------------------|--------------------------------------------|-------------------------------|-----------------------------|------------------------------------------|--------------------------------|------------------------------------------------|--------------------------|--------------------------------|
| <b>Dependent variable: type 2 diabetes</b> |     |                            |              |                                |                                            |                               |                             |                                          |                                |                                                |                          |                                |
| Stratum                                    | n   | OR (95% CI)                | <i>p</i>     | n                              | OR (95% CI)                                | <i>p</i>                      | n                           | OR (95% CI)                              | <i>p</i>                       | n                                              | OR (95% CI)              | <i>p</i>                       |
| GG                                         | 574 | 4.371<br>(0.497, 38.422)   | 0.184        | 643                            | 3.728<br>(1.061, 13.097)                   | <b>0.040</b>                  | 1,513                       | 4.811<br>(2.179, 10.621)                 | <b>1.01 × 10<sup>-4</sup></b>  | 1,381                                          | 9.189<br>(4.794, 17.614) | <b>2.43 × 10<sup>-11</sup></b> |
| GA                                         | 370 | 19.011<br>(1.433, 252.204) | <b>0.026</b> | 392                            | 29.548<br>(0.006, 1.47 × 10 <sup>5</sup> ) | 0.436                         | 1,116                       | 8.576<br>(0.073, 1.0 × 10 <sup>3</sup> ) | 0.375                          | 669                                            | 5.912<br>(2.184, 16.001) | <b>4.73 × 10<sup>-4</sup></b>  |
| AA                                         | 69  | **                         | **           | 48                             | *                                          | *                             | 232                         | 1.774<br>(0.186, 16.928)                 | 0.619                          | 74                                             | ***                      | ***                            |
| <b>Dependent variable: lnFG</b>            |     |                            |              |                                |                                            |                               |                             |                                          |                                |                                                |                          |                                |
| Stratum                                    | n   | β (s.e.)                   | <i>p</i>     | n                              | β (s.e.)                                   | <i>p</i>                      | n                           | β (s.e.)                                 | <i>p</i>                       | n                                              | β (s.e.)                 | <i>p</i>                       |
| GG                                         | 574 | 0.140 (0.061)              | <b>0.021</b> | 537                            | 0.223 (0.049)                              | <b>4.58 × 10<sup>-6</sup></b> | 1,331                       | 0.296 (0.037)                            | <b>5.73 × 10<sup>-16</sup></b> | ****                                           | ****                     | ****                           |
| GA                                         | 370 | 0.148 (0.071)              | <b>0.038</b> | 353                            | 0.263 (0.068)                              | <b>1.17 × 10<sup>-4</sup></b> | 1,036                       | 0.219 (0.046)                            | <b>2.08 × 10<sup>-6</sup></b>  | ****                                           | ****                     | ****                           |
| AA                                         | 69  | 0.064 (0.121)              | 0.597        | 42                             | 0.383 (0.126)                              | <b>0.002</b>                  | 220                         | 0.103 (0.088)                            | 0.243                          | ****                                           | ****                     | ****                           |

\*Too few type 2 diabetes cases (n = 6) to run analysis.

\*\*Too few type 2 diabetes cases (n = 2) to run analysis.

\*\*\*Too few type 2 diabetes cases (n = 16) to run analysis.

\*\*\*\*Fasting glucose was not measured in the Aotearoa New Zealand cohort

**Supplementary Figure S1:** Comparison of the cohort odds ratios and effect sizes in the obesity and genotype-stratified groups.

**a. Dependent variable: type 2 diabetes (T2D)**

**InBMI → T2D**

**Genotype-stratified: GG Group**

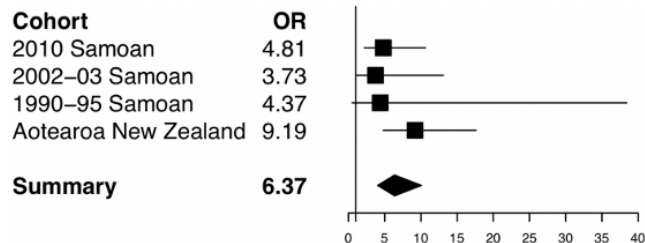

Test of heterogeneity:  $\chi^2 = 2.51$ ;  $I^2 = 0$ ;  $p = 0.473$

**Genotype-stratified: GA Group**

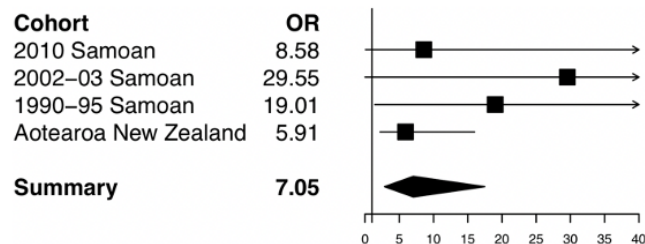

Test of heterogeneity:  $\chi^2 = 0.8$ ;  $I^2 = 0$ ;  $p = 0.849$

**b. Dependent variable: InFG**

**InBMI → InFG**

**Genotype-stratified: GG Group**

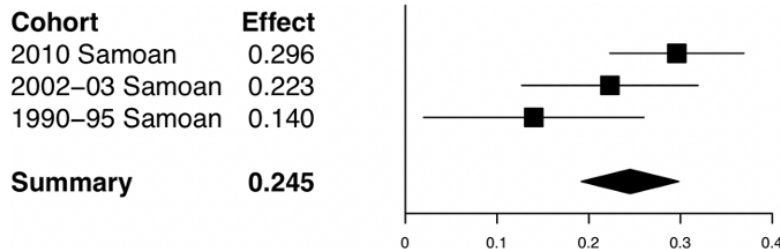

Test of heterogeneity:  $\chi^2 = 5.06$ ;  $I^2 = 60.5$ ;  $p = 0.079$

**Genotype-stratified: GA Group**

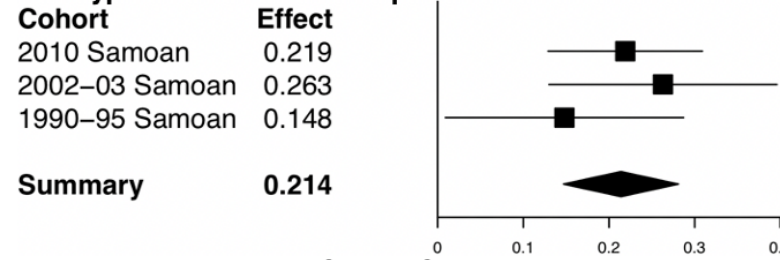

Test of heterogeneity:  $\chi^2 = 1.40$ ;  $I^2 = 0$ ;  $p = 0.498$

**Genotype-stratified: AA Group**

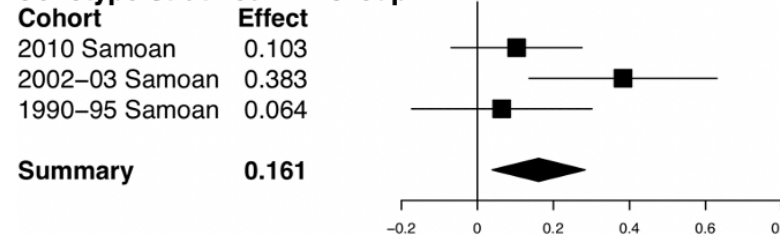

Test of heterogeneity:  $\chi^2 = 4.18$ ;  $I^2 = 52.2$ ;  $p = 0.124$

c. Dependent variable: type 2 diabetes (T2D)

rs37386388 → T2D

Obesity-stratified: without obesity

| Cohort               | OR    |
|----------------------|-------|
| 2010 Samoan          | 0.564 |
| 2002-03 Samoan       | 0.484 |
| 1990-95 Samoan       | 0.403 |
| Aotearoa New Zealand | 0.619 |

Summary 0.575

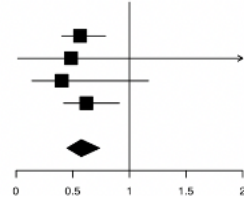

Test of heterogeneity:  $\chi^2 = 0.59$ ;  $I^2 = 0$ ;  $p = 0.899$

Obesity-stratified: with obesity

| Cohort               | OR    |
|----------------------|-------|
| 2010 Samoan          | 0.625 |
| 2002-03 Samoan       | 0.902 |
| 1990-95 Samoan       | 0.783 |
| Aotearoa New Zealand | 0.800 |

Summary 0.729

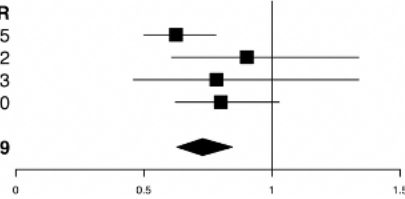

Test of heterogeneity:  $\chi^2 = 3.54$ ;  $I^2 = 15.4$ ;  $p = 0.315$

lnBMI → T2D

Obesity-stratified: without obesity

| Cohort               | OR    |
|----------------------|-------|
| 2010 Samoan          | 12.69 |
| 2002-03 Samoan       | 16.28 |
| 1990-95 Samoan       | 0.19  |
| Aotearoa New Zealand | 6.10  |

Summary 6.27

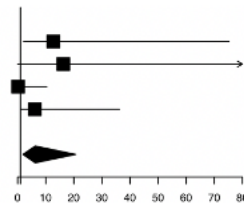

Test of heterogeneity:  $\chi^2 = 3.55$ ;  $I^2 = 15.4$ ;  $p = 0.315$

Obesity-stratified: with obesity

| Cohort               | OR    |
|----------------------|-------|
| 2010 Samoan          | 1.48  |
| 2002-03 Samoan       | 6.03  |
| 1990-95 Samoan       | 16.68 |
| Aotearoa New Zealand | 7.81  |

Summary 4.41

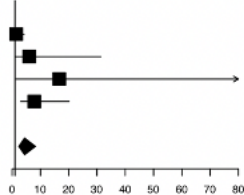

Test of heterogeneity:  $\chi^2 = 6.72$ ;  $I^2 = 55.3$ ;  $p = 0.082$

d. Dependent variable: lnFG

rs37386388 → lnFG

Obesity-stratified: without obesity

| Cohort         | Effect |
|----------------|--------|
| 2010 Samoan    | -0.022 |
| 2002-03 Samoan | -0.045 |
| 1990-95 Samoan | -0.034 |

Summary -0.030

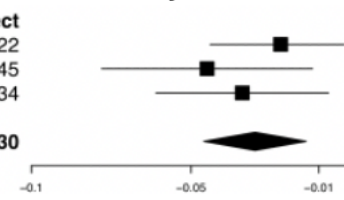

Test of heterogeneity:  $\chi^2 = 1.39$ ;  $I^2 = 0$ ;  $p = 0.500$

Obesity-stratified: with obesity

| Cohort         | Effect |
|----------------|--------|
| 2010 Samoan    | -0.042 |
| 2002-03 Samoan | -0.010 |
| 1990-95 Samoan | -0.027 |

Summary -0.033

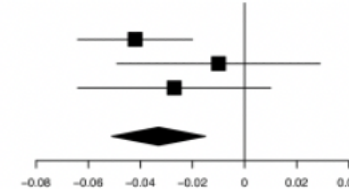

Test of heterogeneity:  $\chi^2 = 4.4$ ;  $I^2 = 2.09$ ;  $p = 0.351$

lnBMI → lnFG

Obesity-stratified: without obesity

| Cohort         | Effect |
|----------------|--------|
| 2010 Samoan    | 0.249  |
| 2002-03 Samoan | 0.251  |
| 1990-95 Samoan | 0.030  |

Summary 0.191

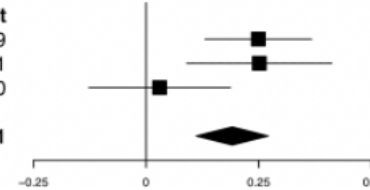

Test of heterogeneity:  $\chi^2 = 5.5$ ;  $I^2 = 63.8$ ;  $p = 0.063$

Obesity-stratified: with obesity

| Cohort         | Effect |
|----------------|--------|
| 2010 Samoan    | 0.023  |
| 2002-03 Samoan | 0.127  |
| 1990-95 Samoan | 0.232  |

Summary 0.093

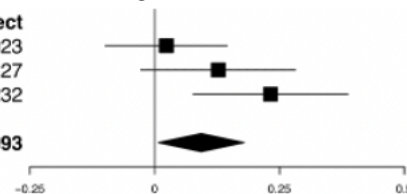

Test of heterogeneity:  $\chi^2 = 3.21$ ;  $I^2 = 37.7$ ;  $p = 0.201$

**Caption:** Forest plots for a comparison of the cohort odds ratios (OR) and 95% confidence intervals in the (a) genotype-stratified and (c) obesity-stratified models with type 2 diabetes as the dependent variable and a comparison of the cohort effect sizes and 95% confidence intervals in the (b) genotype-stratified and (d) obesity-stratified models with lnFG as the dependent variable. In the genotype-stratified analyses (a), there were too few type 2 diabetes cases to run the analyses in the 2002-03 Samoan, 1990-95 Samoan, and Aotearoa New Zealand cohorts.

**Supplementary Figure S2: Pooled analysis Path Analysis Model with Study Cohort Variables**

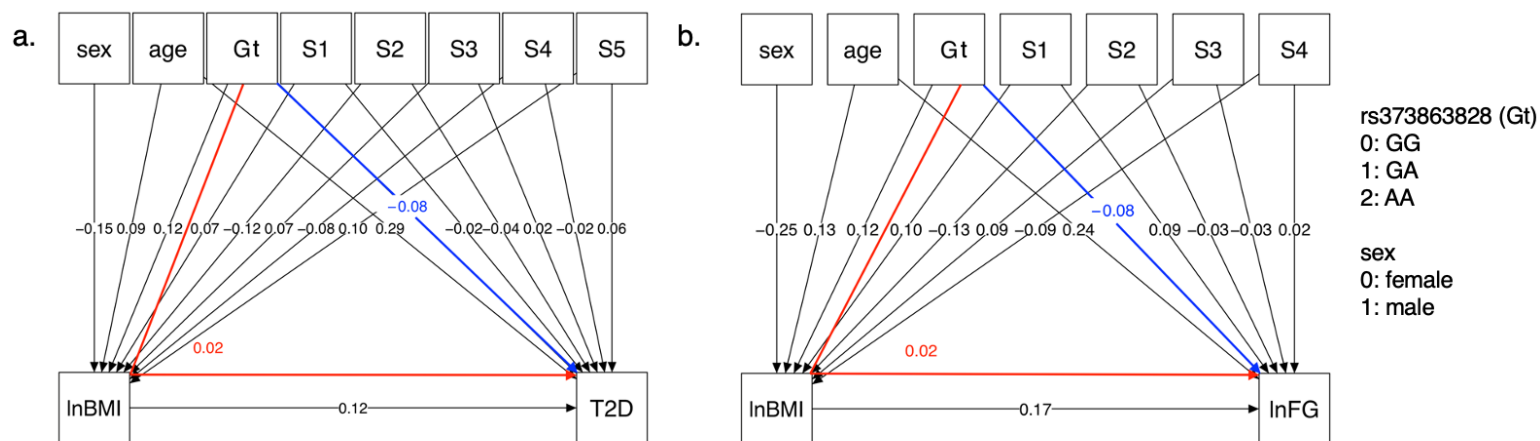

**Caption:** When study cohort variables (S1 – S5) are included in the model, the rs373863828 genotype (Gt) has both direct (blue) and indirect (red) effects on (a) type 2 diabetes (T2D) and (b) lnFG as mediated by lnBMI. For (a), the RMSEA is  $< 0.001$  (90% CI 0.000–0.020) indicating that the path model is a very good fit. For (b), the RMSEA is  $< 0.064$  (90% CI 0.041–0.090) indicating that the path model is a mediocre fit.
